# Supplementary material for: Directionality of point mutation and 5-methylcytosine deamination rates in the chimpanzee genome
Source: PubMed Central journal article supplement (PMC1764022; doi:10.1186/1471-2164-7-316), 2006-12-13
Supplement: 1471-2164-7-316-S1.pdf [file 1471-2164-7-316-S1.pdf]

**Table S1 - Frequencies (%) of nucleotide changes in intergenic regions**

| GC (%) <sup>a</sup>       | No. of SNPs | A→G  | T→C  | G→A  | C→T  | A→C | T→G | G→T | C→A | A→T | T→A | G→C | C→G | <i>u</i> <sup>d</sup> | <i>v</i> <sup>d</sup> | Observed <i>u/v</i> | Expected <i>u/v</i> <sup>e</sup> |
|---------------------------|-------------|------|------|------|------|-----|-----|-----|-----|-----|-----|-----|-----|-----------------------|-----------------------|---------------------|----------------------------------|
| <35 (31.4 <sup>b</sup> )  | 69,874      | 18.6 | 18.6 | 13.9 | 13.8 | 5.1 | 5.0 | 4.2 | 4.0 | 4.8 | 4.5 | 3.8 | 3.7 | 35.9                  | 47.3                  | 1.66                | 2.19                             |
| 35-40 (37.3)              | 60,205      | 17.2 | 17.2 | 16.1 | 15.9 | 4.5 | 4.4 | 4.3 | 4.3 | 3.7 | 3.9 | 4.2 | 4.4 | 40.5                  | 43.3                  | 1.57                | 1.68                             |
| 40-45 (42.2)              | 42,540      | 15.5 | 15.6 | 18.2 | 18.6 | 4.0 | 4.1 | 4.2 | 4.1 | 3.1 | 3.1 | 4.6 | 4.9 | 45.1                  | 39.2                  | 1.58                | 1.37                             |
| 45-50 (47.2)              | 24,821      | 13.3 | 13.2 | 21.3 | 21.2 | 3.6 | 3.6 | 4.5 | 4.2 | 2.7 | 2.5 | 4.9 | 5.0 | 51.3                  | 33.6                  | 1.71                | 1.12                             |
| 50-55 (52.2)              | 14,196      | 11.4 | 11.3 | 23.6 | 23.7 | 3.2 | 2.7 | 4.4 | 4.7 | 2.4 | 2.2 | 5.3 | 5.1 | 56.4                  | 28.6                  | 1.81                | 0.92                             |
| 55-60 (57.2)              | 7521        | 9.6  | 9.5  | 25.6 | 26.5 | 2.1 | 2.8 | 4.7 | 4.4 | 2.1 | 2.0 | 5.6 | 5.2 | 61.2                  | 23.9                  | 1.92                | 0.75                             |
| ≥60 (63.9)                | 4500        | 6.8  | 8.0  | 28.1 | 27.8 | 2.2 | 1.8 | 4.7 | 5.4 | 1.5 | 1.3 | 6.2 | 6.1 | 66.0                  | 18.9                  | 1.97                | 0.57                             |
| 55-75 (60.2) <sup>c</sup> | 11,578      | 8.5  | 8.9  | 26.7 | 27.1 | 2.1 | 2.4 | 4.7 | 4.8 | 1.8 | 1.7 | 5.8 | 5.6 | 63.2                  | 21.9                  | 1.91                | 0.66                             |

<sup>a</sup>GC content in a non-repetitive intergenic region was obtained using a window size of 500 nucleotides.

<sup>b</sup>The average GC content (%) in the subcategory of intergenic regions.

<sup>c</sup>This GC content bin was included for the comparison with the CpG island category.

<sup>d</sup>*u* and *v* denote the rates of G/C→A/T and A/T→G/C, respectively

<sup>e</sup>Given no natural selection and independence of point mutation, Sueoka (1962) [1] proposed that the mean GC content at equilibrium (*c*) is expected to be  $v / (u + v)$ . This equation can be transformed to  $u / v = (1 - c) / c$ . For SNP data,

$$u / v = \frac{N_u / f_{GC}}{N_v / (1 - f_{GC})} = \frac{N_u}{N_v} \times \frac{1 - f_{GC}}{f_{GC}}$$

where *N<sub>u</sub>* and *N<sub>v</sub>* are the numbers of G/C→A/T and A/T→G/C, respectively, and *f<sub>GC</sub>* is the GC content.

## References

1. Sueoka N: **On the genetic basis of variation and heterogeneity of DNA base composition.** *Proc Natl Acad Sci USA* 1962, **48**:582-592.
