# Supplementary material for: Directionality of point mutation and 5-methylcytosine deamination rates in the chimpanzee genome
Source: PubMed Central journal article supplement (PMC1764022; doi:10.1186/1471-2164-7-316), 2006-12-13

**Figure S1 - Linear regression of the frequency of each type of nucleotide changes versus GC content in intergenic regions.**

Intergenic regions were grouped into 7 GC-content bins. Solid lines denote nucleotide changes from G or C and dashed lines denote nucleotides from A or T.

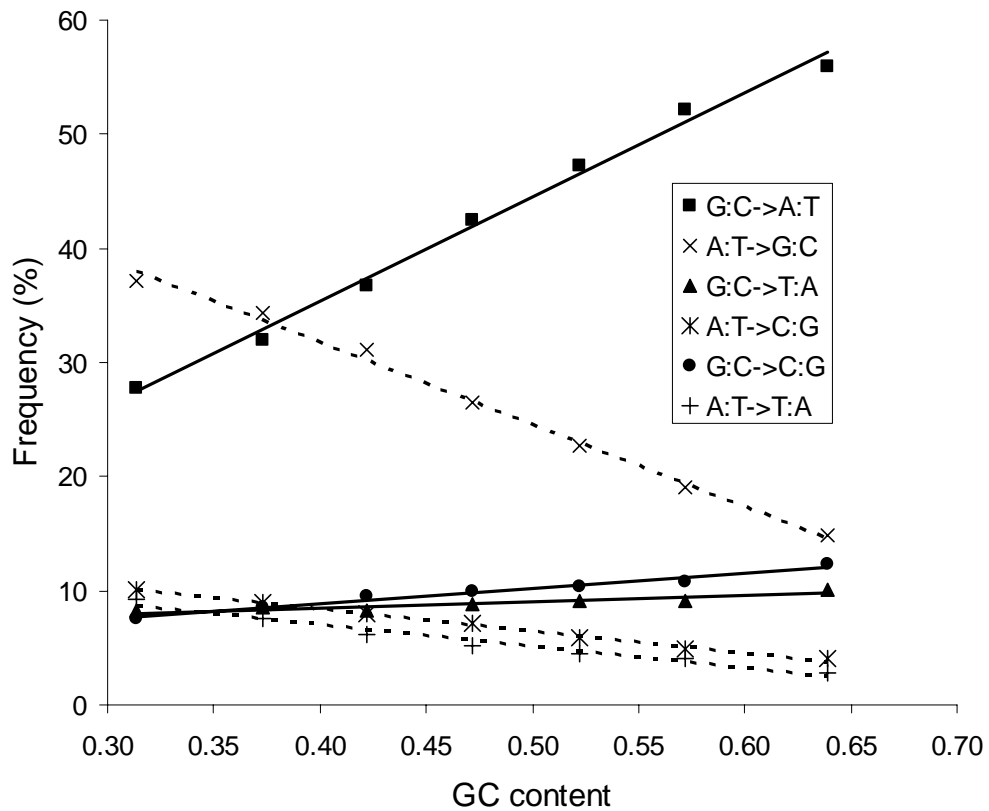

Supplement: 1471-2164-7-316-S2.pdf [file 1471-2164-7-316-S2.pdf]
