# Supplementary material for: Directionality of point mutation and 5-methylcytosine deamination rates in the chimpanzee genome
Source: PubMed Central journal article supplement (PMC1764022; doi:10.1186/1471-2164-7-316), 2006-12-13

**Figure S2 - Frequency difference of nucleotide changes between chimpanzees and humans in each genomic category.**

The frequency difference for each type of nucleotide changes was calculated by subtracting the frequency in the chimpanzee genome from that in the human genome.

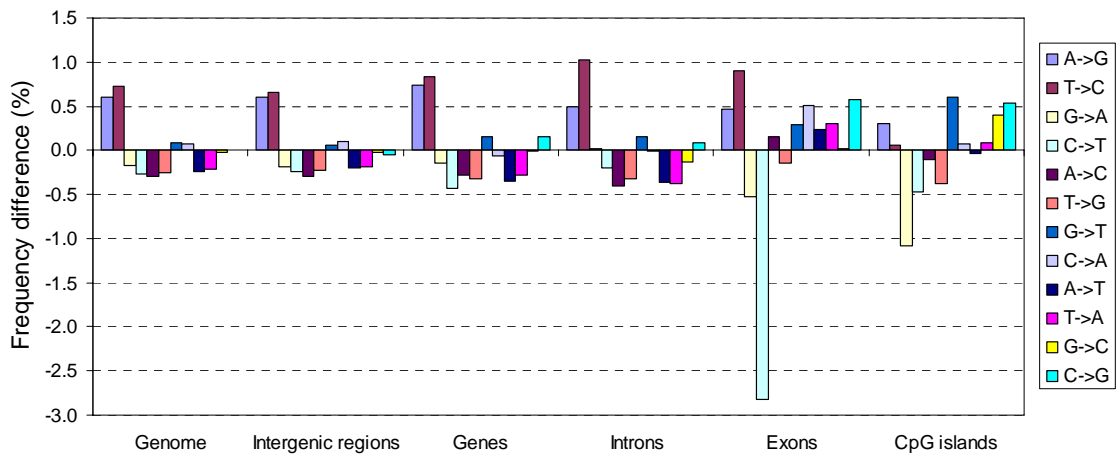

Supplement: 1471-2164-7-316-S3.pdf [file 1471-2164-7-316-S3.pdf]
