# Supplementary material for: Directionality of point mutation and 5-methylcytosine deamination rates in the chimpanzee genome
Source: PubMed Central journal article supplement (PMC1764022; doi:10.1186/1471-2164-7-316), 2006-12-13

**Figure S3 - Frequency difference of nucleotide changes for each pair of syntenic chimpanzee and human chromosomes.**

The frequency difference for each type of nucleotide changes was calculated by subtracting the frequency in the chimpanzee genome from that in the human genome. The Y chromosome was not included due to the insufficient number of SNPs.

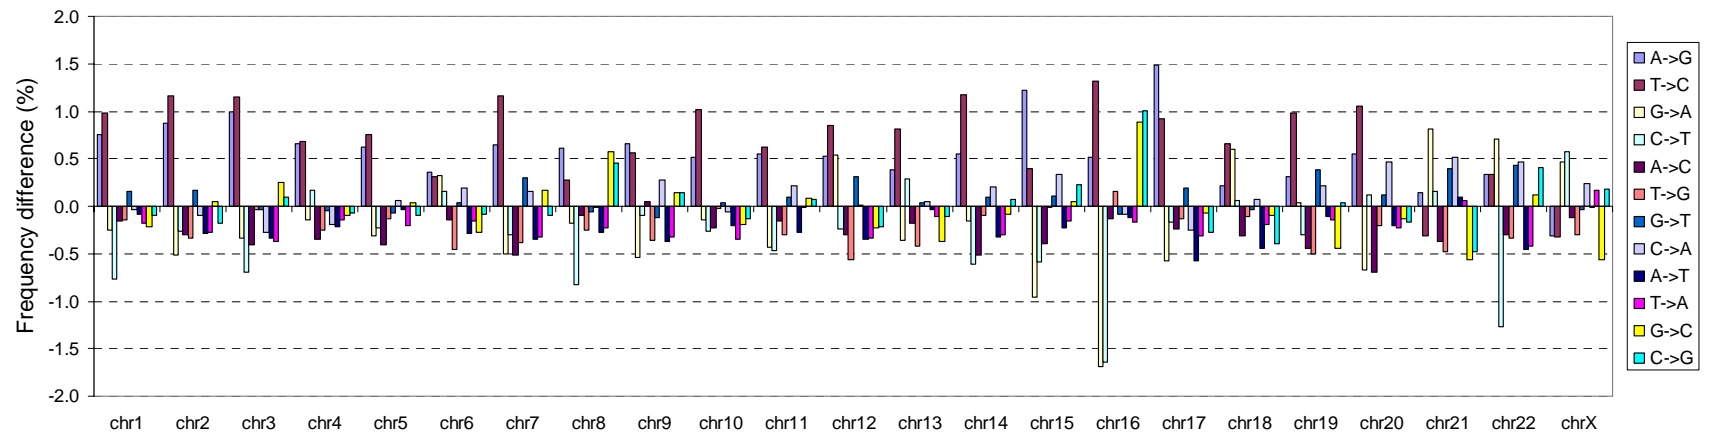

Supplement: 1471-2164-7-316-S4.pdf [file 1471-2164-7-316-S4.pdf]
